# Supplementary material
Source: Research Square preprint supplement (doi:10.21203/rs.3.rs-9891096/v1)
Supplement: Supplementary file 1 [file 816ee9b9c3ced7bef59d6591.docx]

**Supplementary Information**

**Supplementary Table S1.** Primer sequences used in this study

**Supplementary Table S2.** GenBank accession numbers used in this study

**Supplementary Table S3.** Summary of RNA-Seq analysis

**Supplementary Figure S1.** Intestine of *B. tabaci* showing different parts of the digestive system: mouth (‘M’), foregut (‘FG’), filter chamber (‘FC’), caecum (‘CA’), connecting chamber (‘CC’), midgut (‘MG’), and rectal sac (‘RS’). The intestine was observed under a differential interference contrast (left photo) mode at 100x magnification. The scale bar represents 0.1 mm.

**Supplementary Figure S2.** Individual RNAi treatments targeting immune-related genes of Bemisia tabaci. Gene-specific dsRNAs (dsCath-F, dsKnottin, dsPGRP, dsCath-B, dsCath-L, and dsDefensin) were fed to adult whiteflies at a concentration of 500 µg/mL. A non-target gene, EGFP, was used as the control dsRNA (dsCON).

**Supplementary Figure S3.** Individual RNAi treatments specific to six viral genes in the viruliferous *B. tabaci*. The gene-specific dsRNAs (dsRNAV1, dsRNAV2, dsRNAC1, dsRNAC2,dsRNAC3, and dsRNAC4) were fed to the adults at a dose of 500 µg/mL to the adults. A non-target gene, *EGFP*, served as a control dsRNA (dsCON).

**Supplementary Figure S4**. Influence of individual RNAi treatment specific to a viral gene, C2, in the non-viruliferous *B. tabaci*. The gene-specific dsRNA (dsRNAC2) was fed to the adults at a dose of 500 µg/mL to the adults. A non-target gene, *EGFP*, served as a control dsRNA (dsCON).

**Supplementary Table S1.** Primer sequences used in this study

| Primer | Use | Orientation | Sequence (5’-3’) | Annealing temperature (oC) | Amplicon (bp) |
| --- | --- | --- | --- | --- | --- |
| Bt-Dronc | qPCR | Forward | GAGGATCTCATCCAACGACTTC | 52 | 238 |
| Reverse | GAACAGGTAGGTCACCAACTAAT |
| T7-Bt-Dronc | RNAi | Forward | TAATACGACTCACTATAGGGAGAGAGGATCTCATCCAACGACTTC | 52 | 288 |
| Reverse | TAATACGACTCACTATAGGGAGAGAACAGGTAGGTCACCAACTAAT |
| Bt-Cas1 | qPCR | Forward | ACTTACCTTGTTTCGGGAGATG | 52 | 358 |
| Reverse | GACGGCTAACTCGTGTCAATAA |
| T7-Bt-Cas1 |  | Forward | TAATACGACTCACTATAGGGAGAACTTACCTTGTTTCGGGAGATG | 52 | 408 |
| Reverse | TAATACGACTCACTATAGGGAGAGACGGCTAACTCGTGTCAATAA |
| Bt-Cath-B | qPCR | Forward | GGGTCGCTTACTCGTACATTAG | 54 | 285 |
| Reverse | CACTGGTCGCTTGATCTCTTTA |
| T7-Bt-Cath-B | RNAi | Forward | TAATACGACTCACTATAGGGAGAGGGTCGCTTACTCGTACATTAG | 54 | 335 |
| Reverse | TAATACGACTCACTATAGGGAGACACTGGTCGCTTGATCTCTTTA |
| Bt-Cath-F | qPCR | Forward | ATGTCAGTCGGGCACATAAG | 54 | 210 |
| Reverse | CACGATCCCTGAGCTTTGAT |
| T7-Bt-Cath-F | RNAi | Forward | TAATACGACTCACTATAGGGAGAATGTCAGTCGGGCACATAAG | 54 | 260 |
| Reverse | TAATACGACTCACTATAGGGAGACACGATCCCTGAGCTTTGAT |
| Bt-Cath-L | qPCR | Forward | ATCCTCAACAGGAGCCAAATC | 54 | 389 |
| Reverse | TCCGAGTCGTCATCATCATCTA |
| T7-Bt-Cath-L | RNAi | Forward | TAATACGACTCACTATAGGGAGAATCCTCAACAGGAGCCAAATC | 54 | 439 |
| Reverse | TAATACGACTCACTATAGGGAGATCCGAGTCGTCATCATCATCTA |
| Bt-CYP5 | qPCR | Forward | GGATATTTACCGGGACAACAGA | 52 | 300 |
| Reverse | GCATAAATACGACAGCCCATTG |
| T7-Bt-CYP5 | RNAi | Forward | TAATACGACTCACTATAGGGAGAGGATATTTACCGGGACAACAGA | 52 | 350 |
| Reverse | TAATACGACTCACTATAGGGAGAGCATAAATACGACAGCCCATTG |
| Bt-CYP6 | qPCR | Forward | TGGATACCTGCCTTGGATTG | 52 | 421 |
| Reverse | CGTGCCTACCGAATGAAAGA |
| T7-Bt-CYP6 | RNAi | Forward | TAATACGACTCACTATAGGGAGATGGATACCTGCCTTGGATTG | 52 | 471 |
| Reverse | TAATACGACTCACTATAGGGAGACGTGCCTACCGAATGAAAGA |
| Bt-CYP7 | qPCR | Forward | GGTGCACTTGCTGAGAAATATG | 52 | 405 |
| Reverse | GGTGAAGTAGGAGGTGAAGATG |
| T7-Bt-CYP7 | RNAi | Forward | TAATACGACTCACTATAGGGAGAGGTGCACTTGCTGAGAAATATG | 52 | 455 |
| Reverse | TAATACGACTCACTATAGGGAGAGGTGAAGTAGGAGGTGAAGATG |
| Bt-Defensin | qPCR | Forward | CCATTCTTCCGCACCTTCTA | 54 | 407 |
| Reverse | GGTCTCGCACCAACAATTTAC |
| T7-Bt-Defensin | RNAi | Forward | TAATACGACTCACTATAGGGAGACCATTCTTCCGCACCTTCTA | 54 | 457 |
| Reverse | TAATACGACTCACTATAGGGAGAGGTCTCGCACCAACAATTTAC |
| Bt-PGES | qPCR | Forward | ACCTGGGAGCGGTATCTTAT | 56 | 274 |
| Reverse | GCTCCACCGATGATGAGTTATT |
| T7-Bt-PGES | RNAi | Forward | TAATACGACTCACTATAGGGACCTGGGAGCGGTATCTTAT | 56 | 324 |
| Reverse | TAATACGACTCACTATAGGGGCTCCACCGATGATGAGTTATT |
| Bt-PGE2R | qPCR | Forward | CCTTCCTTTGACTGTCGATTCT | 56 | 364 |
| Reverse | GGAACAAGGACATCATCCCTATC |
| T7-Bt-PGE2R | RNAi | Forward | TAATACGACTCACTATAGGGCCTTCCTTTGACTGTCGATTCT | 56 | 414 |
| Reverse | TAATACGACTCACTATAGGGGGAACAAGGACATCATCCCTATC |
| Bt-PGRP | qPCR | Forward | GGTGGCGATGGATCTGTTTAT | 54 | 233 |
| Reverse | GGCAAACTCTACGGACATAGTT |
| T7-Bt-PGRP | RNAi | Forward | TAATACGACTCACTATAGGGAGAGGTGGCGATGGATCTGTTTAT | 54 | 283 |
| Reverse | TAATACGACTCACTATAGGGAGAGGCAAACTCTACGGACATAGTT |
| Bt-PLA2-A | qPCR | Forward | TCTCCTCCTGCGAGTTCTAT | 52 | 321 |
| Reverse | CTGTGTTGCCACTGTTATTC |
| T7-Bt-PLA2-A | RNAi | Forward | TAATACGACTCACTATAGGGTCTCCTCCTGCGAGTTCTAT | 52 | 371 |
| Reverse | TAATACGACTCACTATAGGGCTGTGTTGCCACTGTTATTC |
| Bt-PLA2-B | qPCR | Forward | ATCGACCACCTCAGGGAATA | 52 | 203 |
| Reverse | CTTATGCCTCCTCCGTCAATAC |
| T7-Bt-PLA2-B | RNAi | Forward | TAATACGACTCACTATAGGGATCGACCACCTCAGGGAATA | 52 | 253 |
| Reverse | TAATACGACTCACTATAGGGCTTATGCCTCCTCCGTCAATAC |
| Bt-PLA2-C | qPCR | Forward | TGCATCGATGGAGTCTGTAATC | 52 | 239 |
| Reverse | TGATTTCCCTCTTCGGTATGT |
| T7-Bt-PLA2-C | RNAi | Forward | TAATACGACTCACTATAGGGTGCATCGATGGAGTCTGTAATC | 52 | 289 |
| Reverse | TAATACGACTCACTATAGGGTGATTTCCCTCTTCGGTATGT |
| Bt-PLA2-D | qPCR | Forward | TTTAGATGAGTCGGGAGAAC | 52 | 313 |
| Reverse | AGCAGCTAGGTGACTGAAATAC |
| T7-Bt-PLA2-D | RNAi | Forward | TAATACGACTCACTATAGGGTTTAGATGAGTCGGGAGAAC | 52 | 363 |
| Reverse | TAATACGACTCACTATAGGGAGCAGCTAGGTGACTGAAATAC |
| Bt-JHEH | qPCR | Forward | GTACAACGATGGAGGGCTTTAT | 52 | 329 |
| Reverse | GAGAGCGACTGCGCTATTT |
| T7-Bt-JHEH | RNAi | Forward | TAATACGACTCACTATAGGGAGAGTACAACGATGGAGGGCTTTAT | 52 | 379 |
| Reverse | TAATACGACTCACTATAGGGAGAGAGAGCGACTGCGCTATTT |
| Bt-sEH1 | qPCR | Forward | ATCTCTACTGGTCCTCCTTACC | 54 | 324 |
| Reverse | CTGTTTCTGGGTGCTCTTGA |
| T7-Bt-sEH1 | RNAi | Forward | TAATACGACTCACTATAGGGAGAATCTCTACTGGTCCTCCTTACC | 54 | 374 |
| Reverse | TAATACGACTCACTATAGGGAGACTGTTTCTGGGTGCTCTTGA |
| Bt-sEH2 | qPCR | Forward | GTCCACACCCAAATCTCTACTG | 52 | 290 |
| Reverse | GACCTCAATCATCCCACTCTTATT |
| T7-Bt-sEH2 | RNAi | Forward | TAATACGACTCACTATAGGGAGAGTCCACACCCAAATCTCTACTG | 52 | 340 |
| Reverse | TAATACGACTCACTATAGGGAGAGACCTCAATCATCCCACTCTTATT |
| Bt-sEH3 | qPCR | Forward | GTCCACACCCAAATCTCTACTG | 52 | 293 |
| Reverse | GACCTCAATCATCCCACTCTTATT |
| T7-Bt-sEH3 | RNAi | Forward | TAATACGACTCACTATAGGGAGAGTCCACACCCAAATCTCTACTG | 52 | 343 |
| Reverse | TAATACGACTCACTATAGGGAGAGACCTCAATCATCCCACTCTTATT |
| TYLCV-CP | qPCR | Forward | GCGATATAATCATTTCCACGCCC |  | 530 |
| Reverse | CCTCATCACTTGAAACCTATC |
| T7-TYLCV-CP | RNAi | Forward | TAATACGACTCACTATAGGGAGAGCGATATAATCATTTCCACGCCC | 54 | 580 |
| Reverse | TAATACGACTCACTATAGGGAGACCTCATCACTTGAAACCTATC |
| TYLCV-MP | qPCR | Forward | ATGGACGTACAGGCCCATGTA | 54 | 466 |
| Reverse | TGCCTGTTCCTTCATTCCAGAG |
| T7-TYLCV-MP | RNAi | Forward | TAATACGACTCACTATAGGGAGAATGGACGTACAGGCCCATGTA | 54 | 516 |
| Reverse | TAATACGACTCACTATAGGGAGATGCCTGTTCCTTCATTCCAGAG |
| TYLCV-C1 | qPCR | Forward | CCTATATGAGGAGGTAGGTCCT | 54 |  |
| Reverse | TCTCTGGACCGGGTGTAACAA |
| T7-TYLCV-C1 | RNAi | Forward | TAATACGACTCACTATAGGGAGACCTATATGAGGAGGTAGGTCCT | 54 | 700 |
| Reverse | TAATACGACTCACTATAGGGAGAGCTCAACAGATGTCAAGACCTACG |
| TYLCV-C2 | qPCR | Forward | ACGACCAGTCTGAGGCTGTAATG | 54 | 390 |
| Reverse | TGCAATCTTCGTCACCCTCTAC |
| T7-TYLCV-C2 | RNAi | Forward | TAATACGACTCACTATAGGGAGAACGACCAGTCTGAGGCTGTAATG | 54 | 440 |
| Reverse | TAATACGACTCACTATAGGGAGATGCAATCTTCGTCACCCTCTAC |
| TYLCV-C3 | qPCR | Forward | CATCATACAATACATGATCAACTGC | 54 | 342 |
| Reverse | ATTCACGCACAGGGGAACTCAT |
| T7-TYLCV-C3 | RNAi | Forward | TAATACGACTCACTATAGGGAGACATCATACAATACATGATCAACTGC | 54 | 392 |
| Reverse | TAATACGACTCACTATAGGGAGAATTCACGCACAGGGGAACTCAT |
| TYLCV-C4 | qPCR | Forward | TATTGAGGGCCTCGGATTTACTGC | 54 | 280 |
| Reverse | CCACATCTCCATGTGCTTATCC |
| T7-TYLCV-C4 | RNAi | Forward | TAATACGACTCACTATAGGGAGATATTGAGGGCCTCGGATTTACTGC | 54 | 330 |
| Reverse | TAATACGACTCACTATAGGGAGACCACATCTCCATGTGCTTATCC |

**Supplementary Table S2.** GenBank accession numbers used in this study

| Abbreviation | Accession number | Species | Protein |
| --- | --- | --- | --- |
| Bt-CYP1 | WEY36949 | *Bemisia tabaci* | CYP |
| Bt-CYP2 | WEY36948 | *B. tabaci* |
| Bt-CYP3 | WEY36947 | *B. tabaci* |
| Bt-CYP4 | WEY36946 | *B. tabaci* |
| Bt-CYP5 | WEY36945 | *B. tabaci* |
| Bt-CYP6 | WEY36943 | *B. tabaci* |
| Bt-CYP7 | WEY36942 | *B. tabaci* |
| Bt-CYP8 | WEY36941 | *B. tabaci* |
| Bt-CYP9 | WEY36940 | *B. tabaci* |
| Bt-CYP10 | WEY36938 | *B. tabaci* |
| Bt-CYP11 | WEY36937 | *B. tabaci* |
| Bt-CYP12 | WEY36936 | *B. tabaci* |
| Bt-CYP13 | WEY36935 | *B. tabaci* |
| Bt-CYP14 | WEY36929 | *B. tabaci* |
| Bt-CYP15 | WEY36928 | *B. tabaci* |
| Bt-CYP16 | WEY36927 | *B. tabaci* |
| Bt-CYP17 | WEY36926 | *B. tabaci* |
| Bt-CYP18 | AEK21836 | *B. tabaci* |
| Bt-CYP19 | AEK21819 | *B. tabaci* |
| Bt-CYP20 | AEK21818 | *B. tabaci* |
| Bt-CYP21 | AEK21816 | *B. tabaci* |
| Bt-CYP22 | AEK21812 | *B. tabaci* |
| Bt-CYP23 | WYM63641 | *B. tabaci* |
| Bt-CYP24 | WJY55138 | *B. tabaci* |
| Bt-CYP25 | AFP49818 | *B. tabaci* |
| Bt-CYP26 | QZP43638 | *B. tabaci* |
| Bt-CYP27 | QZP43637 | *B. tabaci* |
| Bt-CYP28 | QZP43636 | *B. tabaci* |
| Bt-CYP29 | QZP43635 | *B. tabaci* |
| Bt-CYP30 | ASO75058 | *B. tabaci* |
| Bt-CYP31 | ACT78507 | *B. tabaci* |
| Bt-CYP32 | ACD84797 | *B. tabaci* |
| Bt-CYP33 | ACA51846 | *B. tabaci* |
| Bt-CYP34 | QHY21213 | *B. tabaci* |
| Bt-CYP35 | XHH83009 | *B. tabaci* |
| Bt-CYP36 | UCR17213 | *B. tabaci* |
| Bt-CYP37 | AYN79710 | *B. tabaci* |
| Bt-CYP38 | AYN79709 | *B. tabaci* |
| Bt-CYP39 | AYN79708 | *B. tabaci* |
| Bt-CYP40 | AYN79707 | *B. tabaci* |
| Bt-CYP41 | AYN79706 | *B. tabaci* |
| Bt-CYP42 | WFG82908 | *B. tabaci* |
| Bt-CYP43 | UZM07730 | *B. tabaci* |
| Bt-CYP44 | UZM07729 | *B. tabaci* |
| Bt-CYP1 | WEY36949 | *B. tabaci* |
| Hs-CYP1 | NP000766 | *Homo sapiens* |
| Hs-CYP2 | NP000752 | *H. sapiens* |
| Hs-CYP3 | NP000764 | *H. sapiens* |
| Hs-CYP4 | NP000762 | *H. sapiens* |
| Hs-CYP5 | NP000761 | *H. sapiens* |
| Mm-CYP1 | NP083255 | *Mus musculus* |
| Mm-CYP2 | NP067257 | *M. musculus* |
| Mm-CYP3 | NP034137 | *M. musculus* |
| Mm-CYP4 | NP034123 | *M. musculus* |
| Mm-CYP5 | NP034138 | *M. musculus* |
| Rn-CYP1 | NP786942 | *Rattus norvegicus* |
| Se-CYP32 | QWM97828 | *Spodoptera exigua* |
| Fo CYP24 | XP052129246 | *Frankliniella occidentalis* | sEH |
| Bt-JHEH | XP 018907454 | *B. tabaci* |
| Bt-EH1 | XP 018899417 | *B. tabaci* |
| Bt-EH2 | XP 018899416 | *B. tabaci* |
| Bt-EH3 | XP 018899415 | *B. tabaci* |
| Aaeg PA | AAEL006354 | *Aedes aegypti* |
| Aaeg PB | EAT42095 | *A.aegypti* |
| Aaeg1 | XP001651935 | *A.aegypti* |
| Agam1 | EAA10122 | *Anopheles gambiae* |
| Agam2 | EAL40266 | *A. gambiae* |
| Agam3 | EAL40265 | *A. gambiae* |
| mBmori | BAH97088 | *Bombyx mori* |
| Bm | XP004927786 | *B. mori* |
| Bmor X1 | XP004927786 | *B. mori* |
| Bmor X2 | XP021204834 | *B. mori* |
| Cele | CCD61875 | *Caenorhabditis elegans* |
| Dmel | BAD04047 | *Drosophila melanogaster* |
| Fo-EH2 | XP026280634 | *F. occidentalis* |
| Fo-JHEH | KAE8745912 | *F. occidentalis* |
| Ggal | AAZ38461 | *Gallus* |
| Harm | XP021183905 | *Helicoverpa armigera* |
| Hsap | AAC41694 | *H. sapiens* |
| Hsap Hs | NP775838 | *H. sapiens* |
| Mmus | AAA37555 | *M. musculus domesticus* |
| Pxyl | XP011556182 | *Plutella xylostella* |
| sRnor | CAA46211 | *Rattus norvegicus* |
| mRnor | AAA41585 | *R. norvegicus* |
| Se-JHEH | ABD85119 | *S. exigua* |
| Se-sEH | QWM97829 | *S. exigua* |
| Slit | XP022829648 | *S. litura* |
| Spur | NP001121538 | *Strongylocentrotus urpuratus* |
| Bt-III | NP_001074379 | *Bos taurus* | PLA2 |
| Cl-III | XP_025330373 | *Canis lupus dingo* |
| Cg-III | XP_003509348 | *Cricetulus griseus* |
| Dr-III | AAI08012 | *Danio rerio* |
| Fc-III | XP_023097342 | *Felis catus* |
| Hsa-III | NP_056530 | *H. sapiens* |
| It-III | XP_005339912 | *Ictidomys tridecemlineatus* |
| Mn-III | XP_011748880 | *Macaca nemestrina* |
| Ma-III | XP_005068966 | *Mesocricetus auratus* |
| Md-III | XP_008543925 | *Microplitis demolitor* |
| Mm-III | NP_766379 | *M. musculus* |
| Pp-III | XP_003826977 | *Pan paniscus* |
| Pa-III | XP_009215381 | *Papio anubis* |
| Rn-III | NP_001099485 | *R. norvegicus* |
| Se-III | AZL90156 | *S. exigua* |
| Hsa-IV | NP_077734 | *H. sapiens* |
| Pt-IV | XP_001165694 | *Pan troglodytes* |
| Ggg-IV | XP_004028114 | *Gorilla gorilla gorilla* |
| Rn-IV | NP_598235 | *R. norvegicus* |
| Mm-IV | NP_032895 | *M. musculus* |
| Hsa-VI | NP_001004426 | *H. sapiens* |
| Ggg-VI | XP_030861468 | *G. gorilla gorilla* |
| Poa-VI | XP_054325493 | *Pongo pygmaeus* |
| Mmu-VI | XP_028683552 | *Macaca mulatta* |
| Pit-VI | XP_023077806 | *Piliocolobus tephrosceles* |
| Rn-XV | NP_001004277 | *R. norvegicus* |
| Hsa-VIII | NP_001242939 | *H. sapiens* |
| Ggg-VIII | XP_030868607 | *G. gorilla gorilla* |
| Pat-VIII | XP_057158930 | *P. paniscus* |
| Mm-XV | NP_598553 | *M. musculus* |
| Hsa-XV | NP_036452 | *H. sapiens* |
| Op-XV | XP_004584230 | *Ochotona princeps* |
| FoPLA2-A | KAE8741843 | *F. occidentalis* |
| FoPLA2-B | XP_026293214 | *F. occidentalis* |
| FoPLA2-C | XP_026288906 | *F. occidentalis* |
| FoPLA2-D | XP_026285023 | *F. occidentalis* |
| BtPLA2-A | XP_018906397 | *B. tabaci* |
| BtPLA2-B | XP_018904671 | *B. tabaci* |
| BtPLA2-C | XP_018909500 | *B. tabaci* |
| BtPLA2-D | XP_018914736 | *B. tabaci* |
| Ag-PGES2 | XP_050055881 | *Aphis gossypii* | PGES2 |
| Nl-PGES2 | XP_039285916 | *Nilaparvata lugens* |
| Pc-PGES2 | XP_065205169 | *Planococcus citri* |
| At-PGES2 | XP_013189219 | *Amyelois transitella* |
| Bm-PGES2 | XP_012548985 | *B. mori* |
| Gm-PGES2 | XP_026759547 | *Galleria mellonella* |
| Sf-PGES2 | XP_035431091 | *S. frugiperda* |
| Se-PGES2 | AYD37767 | *S. exigua* |
| Tp-PGES2 | XP_034254866 | *Thrips palmi* |
| Fo-PGES2 | XP_026276173 | *F. occidentalis* |
| Ff-PGES2 | KAK3913179 | *F. fusca* |
| Bt-PGES2 | XP_018915501 | *B.tabaci* |
| Ac-PGES2 | XP_016920618 | *Apis cerana* |
| Ln-PGES2 | KMQ94024 | *Lasius niger* |
| Pl-PGES2 | BFW60122 | *Polyrhachis lamellidens* |
| Px-PGES2 | XP_011568368 | *P. xylostella* |
| Mp-PGES2 | XP_012527154 | *Monomorium pharaonis* |
| Tl-PGES2 | XP_071647408 | *Temnothorax longispinosus* |
| Pm-PGES2 | XP_070148944 | *Polyergus mexicanus* |
| Hs-PGES2 | NP_079348 | *H. sapiens* |
| Bt-PGE2R-EP3 | XP_018915501 | *B. tabaci* | PGE2R |
| Hs-PGE2R-EP3 | XP_047279857 | *H. sapiense* |
| Ac-PGE2R-EP3 | XP_016906572 | *A. cerana* |
| Nm-PGE2R-EP3 | XP_031837582 | *Nomia melanderi* |
| Mg-PGE2R-EP3 | XP_033328769 | *Megalopta genalis* |
| Ol-PGE2R-EP3 | XP_034173340 | *Osmia lignaria* |
| Vv-PGE2R-EP3 | XP_050850281 | *Vespula vulgaris* |
| Ha-PGE2R-EP3 | XP_054006777 | *Hylaeus anthracinus* |
| Pm-PGE2R-EP3 | XP_070168940 | *Polyergus mexicanus* |
| Bf-PGE2R-EP3 | XP_071861962 | *Bombus fervidus* |
| Hr-PGE2R-EP3 | XP_076658319 | *Halictus rubicundus* |
| Ba-PGE2R-EP3 | XP_023935228 | *Bicyclus anynana* |
| Ls-PGE2R-EP3 | XP_050681916 | *Leptidea sinapis* |
| Cf-PGE2R-EP3 | XP_073959064 | *Choristoneura fumiferana* |
| Cs-PGE2R-EP3 | XP_063624725 | *Cydia splendana* |
| Cst-PGE2R-EP3 | XP_063536730 | *C. strobilella* |
| Cfa-PGE2R-EP3 | XP_063379005 | *C. fagiglandana* |
| Cp-PGE2R-EP3 | XP_061729590 | *C. pomonella* |
| At-PGE2R-EP3 | AFM38201 | *Anasa tristis* |
| Ti-PGE2R-EP3 | JAC16587 | *Triatoma infestans* |
| Pc-PGE2R-EP3 | XP_065212420 | *Planococcus citri* |
| Rp-PGE2R-EP3 | XP 073979352 | *Rhodnius prolixus* |
| Hh-PGE2R-EP3 | XP 014283516 | *Halyomorpha halys* |

**Supplementary Table S3.** Summary of RNA-Seq analysis

| Treatments | Total read bases (bp) | Total raw reads | # of clean reads | # of mapped reads |
| --- | --- | --- | --- | --- |
| Non-viruliferous | 3,700,000,000 | 30,475,776 | 29,813,838 (97.83) | 24,387,996 |
| Viruliferous | 3,900,000,000 | 32,076,630 | 31,266,388 (97.47) | 25,731,071 |

**Supplementary Table S4.** Genes assessed in KEGG analysis

| **Genes** | **Abbreviation** | **KO numbers** |
| --- | --- | --- |
| 4-hydroxy-3-polyprenylbenzoate 5-hydroxylase | COQ6 | [K06126](https://www.kegg.jp/entry/ko:K06126) |
| Secretory phospholipase A2 | PLA2G | [K01047](https://www.kegg.jp/entry/ko:K01047) |
| Phospholipase D3/4 | PLD3_4 | [K16860](https://www.kegg.jp/entry/ko:K16860) |
| Plasmanylethanolamine desaturase | TMEM189 | [K20656](https://www.kegg.jp/entry/ko:K20656) |
| Fatty acid synthase, animal type | FASN | [K00665](https://www.kegg.jp/entry/ko:K00665) |
| 5-aminolevulinate synthase | E2.3.1.37 | [K00643](https://www.kegg.jp/entry/ko:K00643) |
| Acetyl-CoA carboxylase | ACACA | [K11262](https://www.kegg.jp/entry/ko:K11262) |
| 3-hydroxybutyrate dehydrogenase | BDH1 | [K00019](https://www.kegg.jp/entry/ko:K00019) |
| Ethanolamine-phosphate phospho-lyase | AGXT2L1 | [K14286](https://www.kegg.jp/entry/ko:K14286) |
| Sphingomyelin phosphodiesterase | SMPD1 | [K12350](https://www.kegg.jp/entry/ko:K12350) |
| Stearoyl-CoA desaturase | SCD | [K00507](https://www.kegg.jp/entry/ko:K00507) |
| 4-aminobutyrate aminotransferase | ABAT | [K13524](https://www.kegg.jp/entry/ko:K13524) |
| Elongation of very long chain fatty acids protein 7 | ELOVL7 | [K10250](https://www.kegg.jp/entry/ko:K10250) |
| Long-chain-fatty-acid-CoA ligase | ACSL | [K01897](https://www.kegg.jp/entry/ko:K01897) |
| Glycerol kinase | glpK | [K00864](https://www.kegg.jp/entry/ko:K00864) |
| Fructose-bisphosphate aldolase, class I | ALDO | [K01623](https://www.kegg.jp/entry/ko:K01623) |
| Myo-inositol-1-phosphate synthase | INO1 | [K01858](https://www.kegg.jp/entry/ko:K01858) |
| Alpha-1,4-N-acetylglucosaminyltransferase EXTL3 | EXTL3 | [K02370](https://www.kegg.jp/entry/ko:K02370) |
| Trehalose 6-phosphate phosphatase | otsB | [K01087](https://www.kegg.jp/entry/ko:K01087) |
| D-ribulokinase | rbtK | [K00875](https://www.kegg.jp/entry/ko:K00875) |
| Glycerol-3-phosphate dehydrogenase | glpA | [K00111](https://www.kegg.jp/entry/ko:K00111) |
| L-xylulose reductase | DCXR | [K03331](https://www.kegg.jp/entry/ko:K03331) |
| 1-phosphatidylinositol-5-phosphate 4-kinase | PIP4K2 | [K00920](https://www.kegg.jp/entry/ko:K00920) |
| Dolichyl-phosphate-mannose-protein mannosyltransferase | POMT | [K00728](https://www.kegg.jp/entry/ko:K00728) |
| Trehalose 6-phosphate phosphatase | otsB | [K01087](https://www.kegg.jp/entry/ko:K01087) |
| Glycogenin | GYG | [K00750](https://www.kegg.jp/entry/ko:K00750) |
| Glycerol-3-phosphate dehydrogenase (NAD+) | GPD1 | [K00006](https://www.kegg.jp/entry/ko:K00006) |
| Xylosylprotein 4-beta-galactosyltransferase | B4GALT7 | [K00733](https://www.kegg.jp/entry/ko:K00733) |
| Glycerol-3-phosphate O-acyltransferase 1/2 | GPAT1_2 | [K00629](https://www.kegg.jp/entry/ko:K00629) |
| Chitinase | E3.2.1.14 | [K01183](https://www.kegg.jp/entry/ko:K01183) |
| Cytidine deaminase | cdd | [K01489](https://www.kegg.jp/entry/ko:K01489) |
| 1-pyrroline-5-carboxylate dehydrogenase | E1.2.1.88 | [K00294](https://www.kegg.jp/entry/ko:K00294) |
| AMP deaminase | AMPD | [K01490](https://www.kegg.jp/entry/ko:K01490) |
| V-type H+-transporting ATPase subunit G | ATPeV1G | [K02152](https://www.kegg.jp/entry/ko:K02152) |
| Succinyl-CoA synthetase alpha subunit | sucD | [K01902](https://www.kegg.jp/entry/ko:K01902) |
| Cytochrome c oxidase subunit 5b | COX5B | [K02265](https://www.kegg.jp/entry/ko:K02265) |
| Cytochrome c oxidase subunit 8 | COX8 | [K02273](https://www.kegg.jp/entry/ko:K02273) |
| Succinate dehydrogenase iron-sulfur subunit | sdhB | [K00240](https://www.kegg.jp/entry/ko:K00240) |
| F-type H+-transporting ATPase subunit g | ATPeFG | [K02140](https://www.kegg.jp/entry/ko:K02140) |
| Succinate dehydrogenase flavoprotein subunit | sdhA | [K00239](https://www.kegg.jp/entry/ko:K00239) |
| Ubiquinol-cytochrome c reductase subunit 8 | QCR8 | [K00418](https://www.kegg.jp/entry/ko:K00418) |
| F-type H+-transporting ATPase subunit gamma | ATPeF1G | [K02136](https://www.kegg.jp/entry/ko:K02136) |
| NADH dehydrogenase (ubiquinone) Fe-S protein 4 | NDUFS4 | [K03937](https://www.kegg.jp/entry/ko:K03937) |
| Ornithine decarboxylase | E4.1.1.17 | [K01581](https://www.kegg.jp/entry/ko:K01581) |
| NADH dehydrogenase (ubiquinone) Fe-S protein 1 | NDUFS1 | [K03934](https://www.kegg.jp/entry/ko:K03934) |
| F-type H+/Na+-transporting ATPase subunit beta | ATPF1B | [K02112](https://www.kegg.jp/entry/ko:K02112) |
| ATP citrate (pro-S)-lyase | ACLY | [K01648](https://www.kegg.jp/entry/ko:K01648) |
| 2-oxoglutarate dehydrogenase E1 component | OGDH | [K00164](https://www.kegg.jp/entry/ko:K00164) |
| Ubiquinol-cytochrome c reductase cytochrome c1 subunit | CYC1 | [K00413](https://www.kegg.jp/entry/ko:K00413) |
| NAD+ kinase | ppnK | [K00858](https://www.kegg.jp/entry/ko:K00858) |
| cAMP-specific phosphodiesterase 4 | PDE4 | [K13293](https://www.kegg.jp/entry/ko:K13293) |
| F-type H+-transporting ATPase subunit c | ATPeF0C | [K02128](https://www.kegg.jp/entry/ko:K02128) |

**
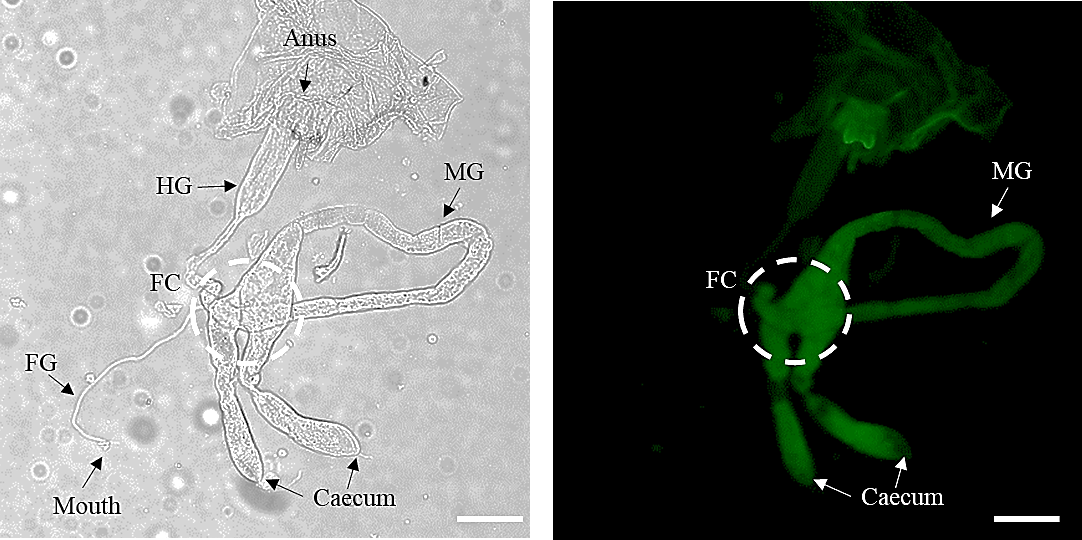
**

**Supplementary Fig. S1**

**
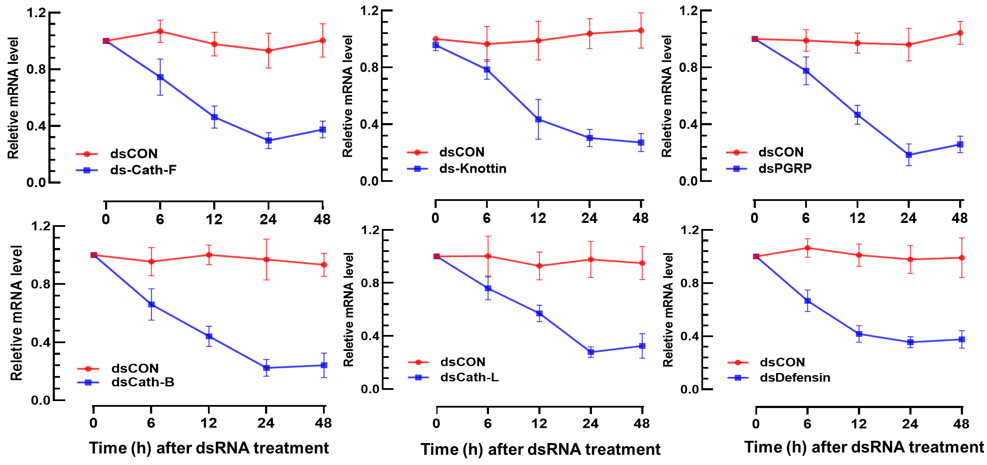
**

**Supplementary Fig. S2**

**
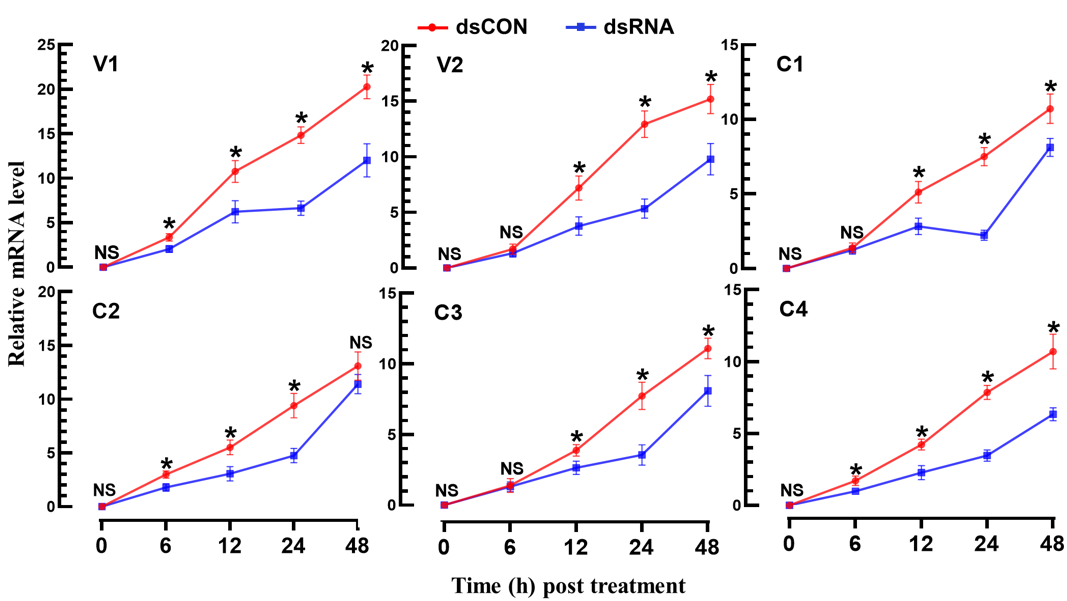
**

**Supplementary Fig. S3**

**
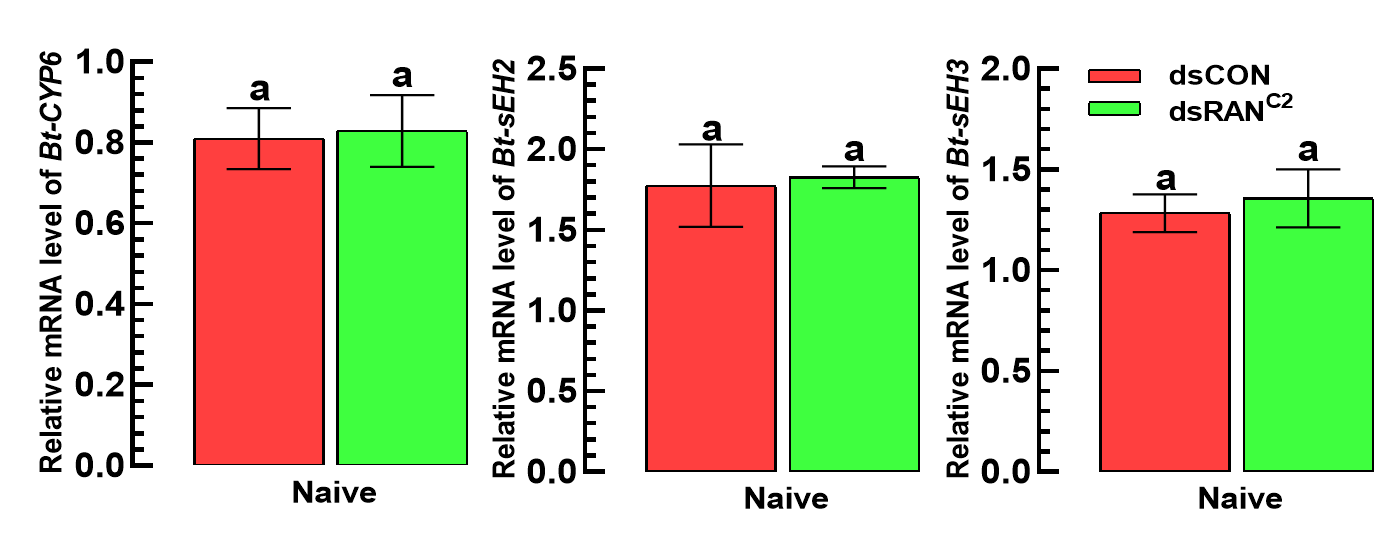
**

**Supplementary Fig. S4**
